# Supplementary material for: Architectures of transition metal(ii) polymeric frameworks constructed from 3- fluorophthalic acid and 1,3-bis(4-pyridyl)propane: synthesis, crystal structures and properties
Source: Royal Society of Chemistry journal article supplement (doi:10.1039/c2ce25464f), 2012-01-01
Supplement: c2ce25464f.pdf [file c2ce25464f.pdf]

## Supplementary Information

### Architectures of transition metal(II) polymeric frameworks constructed by 3- fluorophthalic acid and 1,3-bis(4-pyridyl)propane: synthesis, crystal structures and properties

Yu -E Cha<sup>a</sup>, Xia Li<sup>\*a</sup>, Xu Ma<sup>a</sup>, Chong-Qing Wan<sup>a</sup>, Xue-Bin Deng<sup>b</sup>, Lin-Pei Jin<sup>b</sup>

Table S1 Bond lengths [Å] and angles [°] for complexes **1-5**

| complex 1         |            |                   |           |
|-------------------|------------|-------------------|-----------|
| Cu(1)-O(3)#1      | 1.9330(19) | Cu(1)-N(2)        | 1.990(2)  |
| Cu(1)-O(2)        | 1.9915(19) | Cu(1)-N(1)        | 2.015(2)  |
| Cu(1)-O(1)        | 2.418(2)   |                   |           |
| O(3)#1-Cu(1)-N(2) | 96.61(9)   | O(3)#1-Cu(1)-O(2) | 159.23(9) |
| N(2)-Cu(1)-O(2)   | 89.48(9)   | O(3)#1-Cu(1)-N(1) | 94.82(9)  |
| N(2)-Cu(1)-N(1)   | 146.65(10) | O(2)-Cu(1)-N(1)   | 90.78(9)  |
| O(3)#1-Cu(1)-O(1) | 100.46(8)  | N(2)-Cu(1)-O(1)   | 108.53(9) |
| O(2)-Cu(1)-O(1)   | 58.82(7)   | N(1)-Cu(1)-O(1)   | 99.98(9)  |
| complex 2         |            |                   |           |
| Cu(1)-O(3)        | 1.946(9)   | Cu(1)-O(9)        | 1.982(16) |
| Cu(1)-O(5)        | 1.997(11)  | Cu(1)-N(1)        | 2.051(11) |
| Cu(1)-N(2)        | 2.115(12)  | Cu(1)-O(6)        | 2.153(14) |
| Cu(2)-N(3)        | 1.998(10)  | Cu(2)-O(1)        | 2.001(8)  |
| Cu(2)-O(10)       | 2.010(8)   | Cu(2)-O(7)        | 2.036(8)  |
| Cu(2)-N(4)        | 2.181(11)  |                   |           |
| O(3)-Cu(1)-O(9)   | 95.9(6)    | O(3)-Cu(1)-O(5)   | 159.6(5)  |
| O(9)-Cu(1)-O(5)   | 71.9(6)    | O(3)-Cu(1)-N(1)   | 96.8(4)   |
| O(9)-Cu(1)-N(1)   | 85.8(6)    | O(5)-Cu(1)-N(1)   | 98.5(5)   |
| O(3)-Cu(1)-N(2)   | 93.5(5)    | O(9)-Cu(1)-N(2)   | 169.0(6)  |
| O(5)-Cu(1)-N(2)   | 97.4(5)    | N(1)-Cu(1)-N(2)   | 98.8(5)   |
| O(3)-Cu(1)-O(6)   | 100.9(4)   | O(9)-Cu(1)-O(6)   | 77.6(6)   |
| O(5)-Cu(1)-O(6)   | 61.2(5)    | N(1)-Cu(1)-O(6)   | 156.8(4)  |
| N(2)-Cu(1)-O(6)   | 95.1(5)    | N(3)-Cu(2)-O(1)   | 94.0(4)   |
| N(3)-Cu(2)-O(10)  | 179.0(5)   | O(1)-Cu(2)-O(10)  | 85.5(3)   |
| N(3)-Cu(2)-O(7)   | 91.9(4)    | O(1)-Cu(2)-O(7)   | 151.3(4)  |
| O(10)-Cu(2)-O(7)  | 88.9(4)    | N(3)-Cu(2)-N(4)   | 92.4(4)   |
| O(1)-Cu(2)-N(4)   | 107.5(4)   | O(10)-Cu(2)-N(4)  | 87.0(4)   |
| O(7)-Cu(2)-N(4)   | 100.3(4)   |                   |           |

<sup>a</sup> Department of Chemistry, Capital Normal University, Beijing 100048, P. R.China Tel.: +86 10 68902320; fax: +86 10 68902320. Email: [xiali@mail.cnu.edu.cn](mailto:xiali@mail.cnu.edu.cn) (Xia Li).

<sup>b</sup> Department of Chemistry, Beijing Normal University, Beijing 100875, P. R. China.

| complex 3           |            |                    |            |
|---------------------|------------|--------------------|------------|
| Cd(1)-N(1)          | 2.316(3)   | Cd(1)-O(1)         | 2.321(2)   |
| Cd(1)-N(2)#1        | 2.335(3)   | Cd(1)-O(4)         | 2.419(3)   |
| Cd(1)-O(3)          | 2.453(3)   | Cd(1)-O(5)         | 2.517(3)   |
| Cd(1)-O(2)          | 2.583(3)   | Cd(2)-O(8)#2       | 2.184(3)   |
| Cd(2)-O(6)          | 2.277(2)   | Cd(2)-O(10)        | 2.349(3)   |
| Cd(2)-O(7)          | 2.563(2)   | Cd(2)-N(3)         | 2.347(3)   |
| Cd(2)-N(4)#3        | 2.303(3)   |                    |            |
| N(1)-Cd(1)-O(1)     | 132.37(9)  | N(1)-Cd(1)-N(2)#1  | 92.69(10)  |
| O(1)-Cd(1)-N(2)#1   | 107.67(10) | N(1)-Cd(1)-O(4)    | 86.60(10)  |
| O(1)-Cd(1)-O(4)     | 125.11(9)  | N(2)#1-Cd(1)-O(4)  | 106.58(11) |
| N(1)-Cd(1)-O(3)     | 138.18(10) | O(1)-Cd(1)-O(3)    | 86.21(9)   |
| N(2)#1-Cd(1)-O(3)   | 88.47(10)  | O(4)-Cd(1)-O(3)    | 53.39(10)  |
| N(1)-Cd(1)-O(5)     | 85.26(9)   | O(1)-Cd(1)-O(5)    | 75.74(9)   |
| N(2)#1-Cd(1)-O(5)   | 176.53(10) | O(4)-Cd(1)-O(5)    | 70.54(10)  |
| O(3)-Cd(1)-O(5)     | 91.19(9)   | N(1)-Cd(1)-O(2)    | 84.04(9)   |
| O(1)-Cd(1)-O(2)     | 52.76(8)   | N(2)#1-Cd(1)-O(2)  | 93.99(10)  |
| O(4)-Cd(1)-O(2)     | 157.76(10) | O(3)-Cd(1)-O(2)    | 137.61(9)  |
| O(5)-Cd(1)-O(2)     | 88.59(9)   | O(8)#2-Cd(2)-O(6)  | 99.79(9)   |
| O(8)#2-Cd(2)-N(4)#3 | 99.09(10)  | O(6)-Cd(2)-N(4)#3  | 157.36(10) |
| O(8)#2-Cd(2)-N(3)   | 110.82(11) | O(6)-Cd(2)-N(3)    | 99.70(10)  |
| N(4)#3-Cd(2)-N(3)   | 85.07(11)  | O(8)#2-Cd(2)-O(10) | 90.09(11)  |
| O(6)-Cd(2)-O(10)    | 85.28(9)   | N(4)#3-Cd(2)-O(10) | 82.31(10)  |
| N(3)-Cd(2)-O(10)    | 157.07(10) | O(8)#2-Cd(2)-O(7)  | 152.82(9)  |
| O(6)-Cd(2)-O(7)     | 53.72(8)   | N(4)#3-Cd(2)-O(7)  | 105.67(9)  |
| N(3)-Cd(2)-O(7)     | 82.68(10)  | O(10)-Cd(2)-O(7)   | 82.41(9)   |
| complex 4           |            |                    |            |
| Co(1)-O(6)          | 2.025(4)   | Co(1)-O(2)         | 2.111(5)   |
| Co(1)-O(1)          | 2.157(4)   | Co(1)-O(5)         | 2.151(4)   |
| Co(1)-N(2)#1        | 2.103(5)   | Co(1)-N(1)         | 2.222(5)   |
| Co(2)-O(3)#2        | 2.006(4)   | Co(2)-O(8)         | 2.106(4)   |
| Co(2)-O(10)         | 2.189(4)   | Co(2)-O(9)         | 2.240(5)   |
| Co(2)-N(3)          | 2.095(5)   | Co(2)-N(4)#3       | 2.110(5)   |
| O(6)-Co(1)-N(2)#1   | 101.3(2)   | O(6)-Co(1)-N(1)    | 91.7(2)    |
| N(2)#1-Co(1)-N(1)   | 90.0(2)    | O(6)-Co(1)-O(5)    | 89.16(18)  |
| N(2)#1-Co(1)-O(5)   | 87.1(2)    | N(1)-Co(1)-O(5)    | 177.0(2)   |
| O(6)-Co(1)-O(1)     | 159.00(17) | N(2)#1-Co(1)-O(1)  | 98.10(19)  |
| N(1)-Co(1)-O(1)     | 96.27(19)  | O(5)-Co(1)-O(1)    | 83.87(17)  |
| O(6)-Co(1)-O(2)     | 99.80(18)  | N(2)#1-Co(1)-O(2)  | 158.57(19) |
| N(1)-Co(1)-O(2)     | 93.0(2)    | O(5)-Co(1)-O(2)    | 89.63(18)  |
| O(1)-Co(1)-O(2)     | 60.49(16)  | O(6)-Co(1)-C(14)   | 128.1(2)   |
| N(2)#1-Co(1)-C(14)  | 128.4(2)   | N(1)-Co(1)-C(14)   | 101.1(2)   |
| O(5)-Co(1)-C(14)    | 80.6(2)    | O(1)-Co(1)-C(14)   | 31.13(19)  |
| O(2)-Co(1)-C(14)    | 30.35(18)  | O(3)#2-Co(2)-N(3)  | 98.80(19)  |

|                     |            |                     |            |
|---------------------|------------|---------------------|------------|
| O(3)#2-Co(2)-O(8)   | 160.24(18) | N(3)-Co(2)-O(8)     | 99.5(2)    |
| O(3)#2-Co(2)-N(4)#3 | 90.5(2)    | N(3)-Co(2)-N(4)#3   | 94.9(2)    |
| O(8)-Co(2)-N(4)#3   | 95.4(2)    | O(3)#2-Co(2)-O(10)  | 88.79(18)  |
| N(3)-Co(2)-O(10)    | 85.3(2)    | O(8)-Co(2)-O(10)    | 85.23(18)  |
| N(4)#3-Co(2)-O(10)  | 179.3(2)   | O(3)#2-Co(2)-O(9)   | 99.94(18)  |
| N(3)-Co(2)-O(9)     | 159.18(19) | O(8)-Co(2)-O(9)     | 60.91(17)  |
| N(4)#3-Co(2)-O(9)   | 93.9(2)    | O(10)-Co(2)-O(9)    | 86.15(18)  |
| <b>complex 5</b>    |            |                     |            |
| Ni(1)-O(6)          | 2.012(3)   | Ni(1)-O(5)          | 2.103(4)   |
| Ni(1)-O(2)          | 2.126(3)   | Ni(1)-O(1)          | 2.176(4)   |
| Ni(1)-N(1)          | 2.061(4)   | Ni(1)-N(2)#3        | 2.059(4)   |
| Ni(2)-O(3)#4        | 1.997(3)   | Ni(2)-O(9)          | 2.102(4)   |
| Ni(2)-O(10)         | 2.119(4)   | Ni(2)-O(8)          | 2.181(4)   |
| Ni(2)-N(4)#5        | 2.078(4)   | N(3)-Ni(2)          | 2.045(4)   |
| O(6)-Ni(1)-N(1)     | 91.55(15)  | N(2)#3-Ni(1)-N(1)   | 91.97(17)  |
| O(6)-Ni(1)-O(5)     | 89.38(14)  | N(2)#3-Ni(1)-O(5)   | 86.21(18)  |
| N(1)-Ni(1)-O(5)     | 178.05(18) | O(6)-Ni(1)-O(2)     | 160.40(14) |
| N(2)#3-Ni(1)-O(2)   | 100.11(15) | N(1)-Ni(1)-O(2)     | 94.97(15)  |
| O(5)-Ni(1)-O(2)     | 84.69(15)  | O(6)-Ni(1)-O(1)     | 99.84(15)  |
| N(2)#3-Ni(1)-O(1)   | 161.19(15) | N(1)-Ni(1)-O(1)     | 93.15(17)  |
| O(5)-Ni(1)-O(1)     | 88.37(17)  | O(2)-Ni(1)-O(1)     | 61.41(13)  |
| O(6)-Ni(1)-C(1)     | 129.34(17) | N(2)#3-Ni(1)-C(1)   | 130.20(17) |
| N(1)-Ni(1)-C(1)     | 99.86(16)  | O(5)-Ni(1)-C(1)     | 80.84(17)  |
| O(2)-Ni(1)-C(1)     | 31.19(15)  | O(1)-Ni(1)-C(1)     | 30.99(16)  |
| O(3)#4-Ni(2)-N(3)   | 96.97(16)  | O(3)#4-Ni(2)-N(4)#5 | 90.38(16)  |
| N(3)-Ni(2)-N(4)#5   | 95.32(18)  | O(3)#4-Ni(2)-O(9)   | 161.62(15) |
| N(3)-Ni(2)-O(9)     | 100.32(16) | N(4)#5-Ni(2)-O(9)   | 94.17(17)  |
| O(3)#4-Ni(2)-O(10)  | 89.41(15)  | N(3)-Ni(2)-O(10)    | 85.41(17)  |
| N(4)#5-Ni(2)-O(10)  | 179.26(18) | O(9)-Ni(2)-O(10)    | 85.81(15)  |
| O(3)#4-Ni(2)-O(8)   | 100.24(14) | N(3)-Ni(2)-O(8)     | 160.99(15) |
| N(4)#5-Ni(2)-O(8)   | 92.60(17)  | O(9)-Ni(2)-O(8)     | 61.80(14)  |
| O(10)-Ni(2)-O(8)    | 86.73(15)  |                     |            |

Symmetry transformations used to generate equivalent atoms: For **1**: #1:  $-x+3/2, y+1/2, -z+3/2$ . For **3**: #1  $-x, -y+2, -z$ ; #2:  $-x, -y+2, -z+1$ ; #3:  $-x+1, -y+1, -z+1$ . For **4**: #1  $x, y, z+1$ ; #2  $-x+1, y+1/2, -z+1$ ; #3  $x+1, y, z$ . For **5**, #1  $x, y, z-1$ ; #2  $x-1, y, z$ ; #3  $x, y, z+1$ ; #4  $-x+1, y-1/2, -z+2$ ; #5  $x+1, y, z$ .

**Table S2** Hydrogen bond distance (Å) and angle (°) data for compound **3**

| D-H ...A        | d(D-H) | d(H...A) | <DHA   | d(D...A) |
|-----------------|--------|----------|--------|----------|
| O10A-H10c...O11 | 0.850  | 1.851    | 176.25 | 2.700    |
| O10A-H10d...O12 | 0.850  | 1.970    | 175.66 | 2.818    |
| O11-H11c...O6B  | 0.850  | 2.018    | 163.98 | 2.845    |
| O11-H11d...O9A  | 0.850  | 1.988    | 164.03 | 2.815    |
| O12-H12c...O2   | 0.850  | 2.042    | 179.71 | 2.892    |

O12-H12d... O7 0.850 1.968 179.93 2.818

Symmetry transformations used to generate equivalent atoms: A:  $-x+1, -y+2, -z+1$  B:  $x+1, y, z$

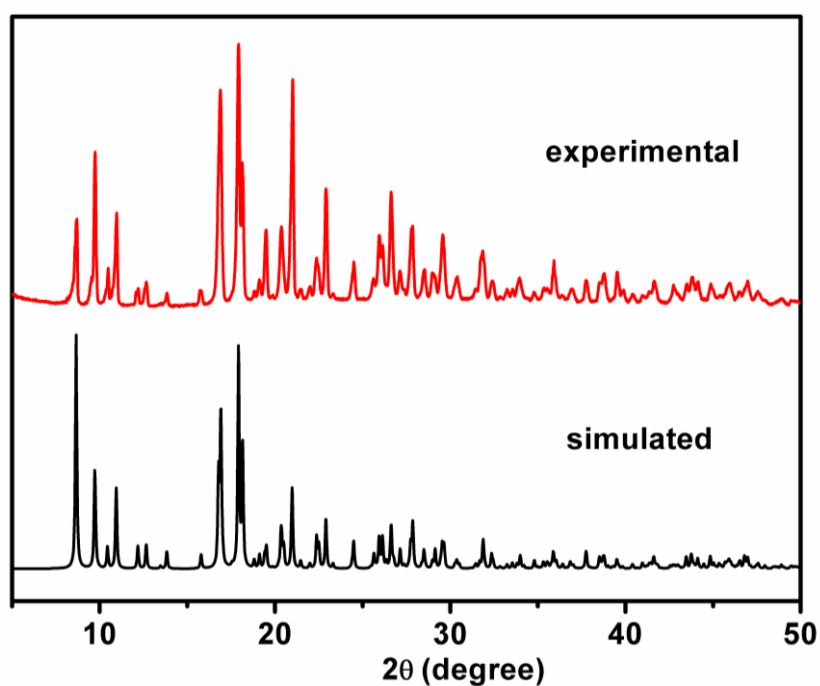

(a)

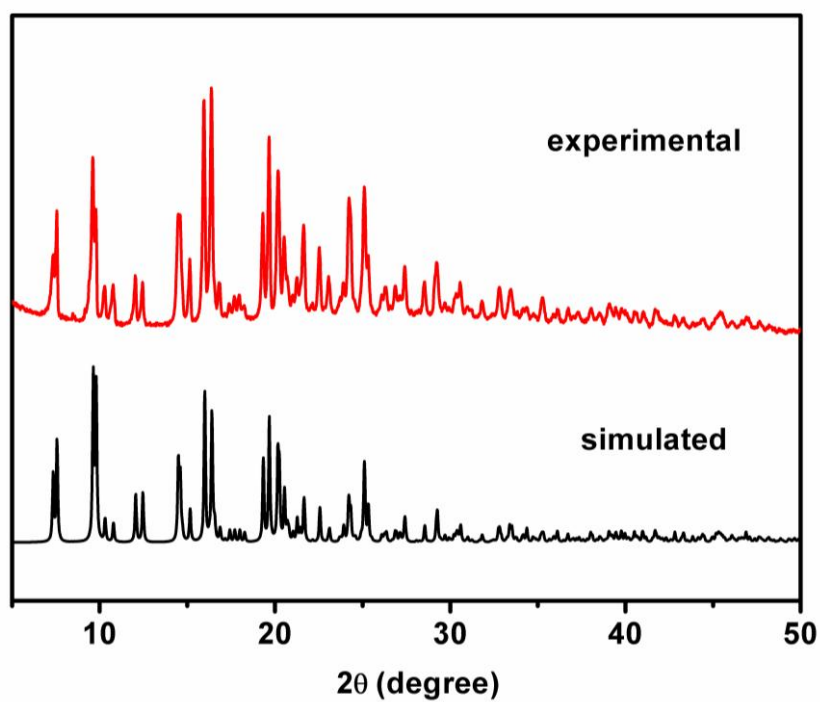

(b)

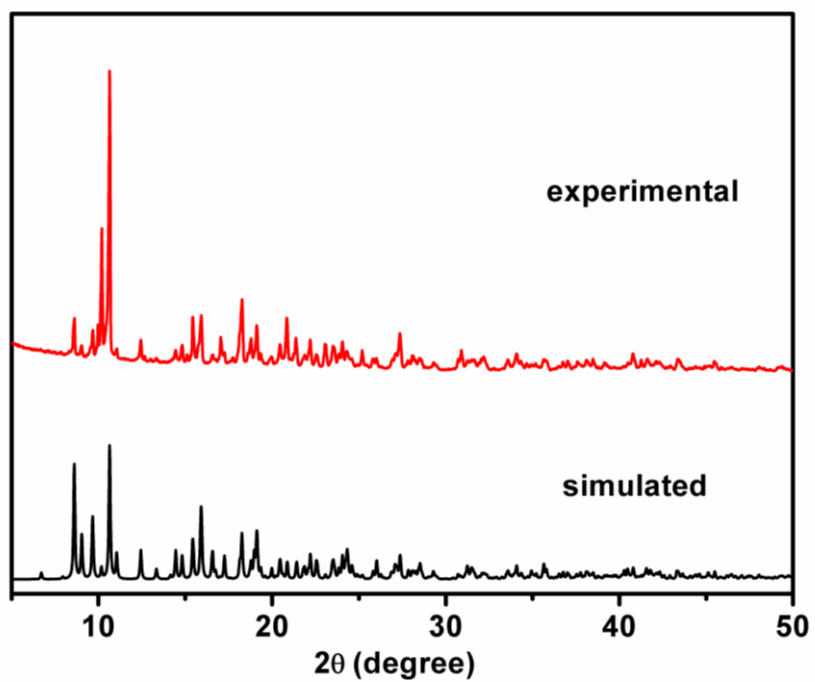

(c)

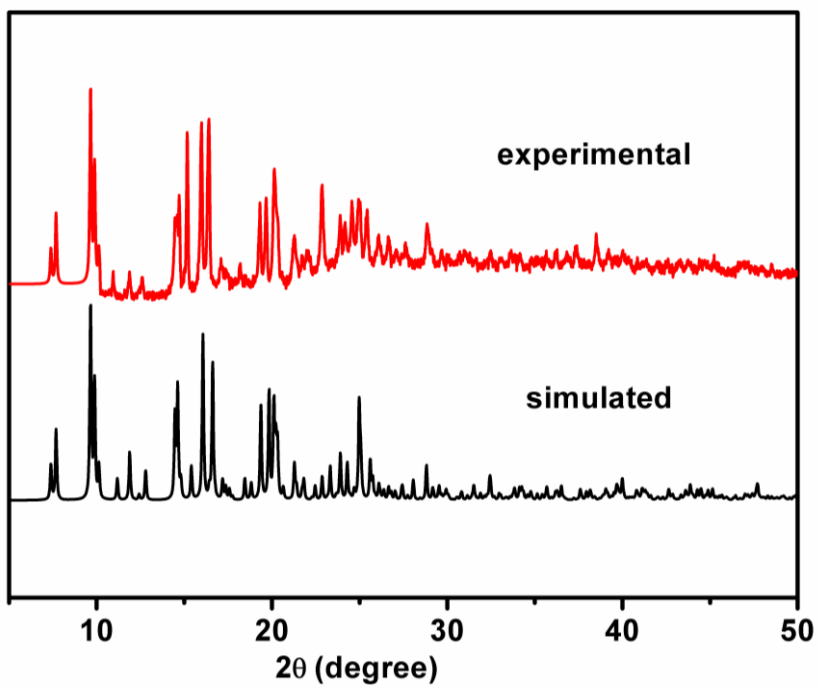

(d)

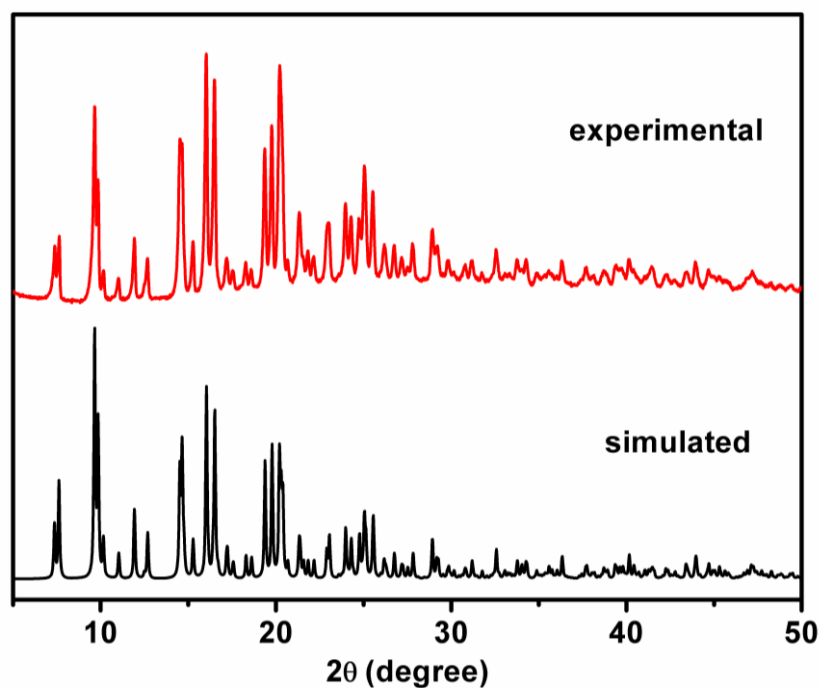

(e)

Fig. S1 The PXR D patterns for complexes 1(a), 2(b), 3(c), 4(d) and 5(e)

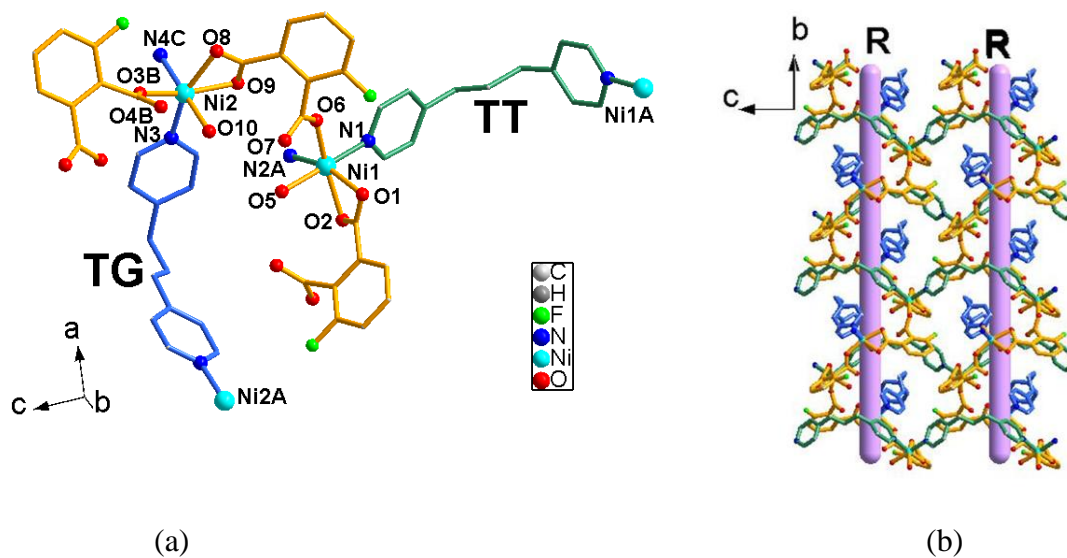

Fig. S2. View of the structure of **5**. (a) The coordination environments of Ni1 and Ni2, showing coordination conformations of ligands between the Ni(II) ions. H atoms are omitted for clarity. Symmetry code: A  $x, y, z+1$ ; B  $-x+1, y-1/2, -z+2$ ; C  $x+1, y, z$ . (b) Ni-Fpht right-handed helices.
